# Supplementary material
Source: publisher figshare collection journal article supplement (https://tandf.figshare.com/articles/dataset/_/7228079)
Supplement: Supplementary file 1 [file 1]

| Compound                     | Peak area of metabolites / peak area of IS |        |         |        |         |        |
|------------------------------|--------------------------------------------|--------|---------|--------|---------|--------|
|                              | Fillet of Australian beef                  |        |         |        |         |        |
|                              | 0.02g                                      |        | 0.05g   |        | 0.1g    |        |
|                              | Average                                    | CV (%) | Average | CV (%) | Average | CV (%) |
| Pyruvic acid                 | 0.10                                       | 16.4   | 0.26    | 11.9   | 0.58    | 6.7    |
| Lactic acid                  | 87.42                                      | 1.1    | 127.31  | 3.9    | 183.81  | 4.7    |
| Glycolic acid                | 0.05                                       | 5.4    | 0.15    | 19.0   | 0.39    | 9.0    |
| Alanine                      | 5.85                                       | 11.2   | 16.98   | 10.8   | 30.42   | 13.9   |
| 3-Hydroxybutyric acid        | 0.32                                       | 0.5    | 0.79    | 6.7    | 1.55    | 7.8    |
| Valine                       | 17.81                                      | 2.8    | 45.08   | 9.1    | 87.09   | 7.7    |
| Urea                         | 48.99                                      | 3.1    | 131.22  | 2.7    | 256.49  | 4.7    |
| 4-Hydroxybutyric acid        | 0.34                                       | 6.6    | 0.93    | 2.9    | 1.68    | 5.5    |
| Dihydroxyacetone             | 0.05                                       | 7.0    | 0.13    | 11.4   | 0.26    | 7.6    |
| Leucine                      | 5.59                                       | 6.4    | 12.95   | 3.3    | 22.18   | 5.0    |
| Glycerol                     | 36.11                                      | 3.1    | 93.87   | 6.3    | 174.03  | 3.9    |
| Phosphoric acid              | 200.51                                     | 3.2    | 292.69  | 2.9    | 397.38  | 4.6    |
| Isoleucine                   | 3.16                                       | 9.5    | 8.15    | 2.4    | 14.56   | 3.9    |
| Proline                      | 1.87                                       | 10.0   | 4.55    | 0.6    | 7.24    | 5.9    |
| Succinic acid                | 0.97                                       | 5.5    | 2.59    | 8.0    | 4.83    | 7.2    |
| Glycine                      | 23.46                                      | 3.3    | 60.74   | 7.9    | 109.97  | 7.5    |
| Glyceric acid                | 3.40                                       | 3.6    | 8.75    | 7.0    | 17.01   | 6.6    |
| Fumaric acid                 | 21.40                                      | 14.3   | 50.68   | 14.2   | 102.31  | 13.0   |
| Uracil                       | 0.12                                       | 8.5    | 0.36    | 16.0   | 0.75    | 7.7    |
| Serine                       | 2.51                                       | 6.5    | 6.65    | 4.5    | 12.11   | 6.1    |
| Threonine                    | 8.04                                       | 8.4    | 21.45   | 2.9    | 40.92   | 5.3    |
| Glutaric acid                | 0.03                                       | 26.2   | 0.05    | 5.9    | 0.09    | 11.4   |
| 3-Aminopropanoic acid        | 0.62                                       | 1.8    | 1.67    | 9.6    | 3.10    | 6.7    |
| Niacinamide                  | 4.85                                       | 3.0    | 13.51   | 6.6    | 28.36   | 5.2    |
| Malic acid                   | 5.93                                       | 8.8    | 17.32   | 7.6    | 30.06   | 6.1    |
| N-Acetylserine               | 0.16                                       | 5.7    | 0.51    | 7.7    | 0.98    | 3.1    |
| Aspartic acid                | 0.19                                       | 7.0    | 0.35    | 2.5    | 0.64    | 3.4    |
| Methionine                   | 1.78                                       | 8.2    | 3.82    | 3.4    | 7.18    | 8.8    |
| 5-Oxoproline                 | 2.89                                       | 4.9    | 8.33    | 5.5    | 18.39   | 18.7   |
| 4-Aminobutyric acid          | 0.17                                       | 11.4   | 0.46    | 8.7    | 0.92    | 8.3    |
| Cysteine                     | 10.15                                      | 5.5    | 20.69   | 2.4    | 35.61   | 6.9    |
| Creatinine                   | 69.33                                      | 2.9    | 84.36   | 5.4    | 63.42   | 6.4    |
| Threonic acid                | 0.17                                       | 11.6   | 0.45    | 11.4   | 0.88    | 10.6   |
| Hypotaurine                  | 1.51                                       | 4.0    | 2.85    | 69.1   | 7.74    | 7.6    |
| 3-Aminoglutaric acid         | 0.35                                       | 0.5    | 0.97    | 11.4   | 1.79    | 8.7    |
| Ornithine                    | 3.16                                       | 8.4    | 5.95    | 5.5    | 7.89    | 7.2    |
| Glutamic acid                | 0.33                                       | 9.4    | 0.86    | 5.0    | 1.47    | 9.2    |
| 5-Aminovaleric acid          | 0.03                                       | 16.9   | 0.06    | 15.3   | 0.13    | 7.0    |
| Phenylalanine                | 34.33                                      | 4.4    | 86.03   | 5.5    | 159.06  | 5.9    |
| Arabinose                    | 1.28                                       | 45.4   | 3.10    | 75.6   | 5.73    | 18.7   |
| Homocysteine                 | 0.39                                       | 7.7    | 1.05    | 4.7    | 1.59    | 10.4   |
| Asparagine                   | 0.47                                       | 10.1   | 1.20    | 2.2    | 1.04    | 29.3   |
| Ribose                       | 83.75                                      | 5.3    | 222.07  | 5.0    | 402.91  | 5.4    |
| Ribonolactone                | 0.02                                       | 173.2  | 0.15    | 19.2   | 0.30    | 5.5    |
| Xylitol                      | 1.76                                       | 3.6    | 1.88    | 115.2  | 8.99    | 7.1    |
| Arabitol                     | 0.63                                       | 12.2   | 1.00    | 3.5    | 1.76    | 3.1    |
| Putrescine                   | 0.81                                       | 3.5    | 1.97    | 10.4   | 3.60    | 8.3    |
| Glycerol 3-phosphate         | 0.45                                       | 4.6    | 1.35    | 8.4    | 2.47    | 6.7    |
| Glutamine                    | 2.24                                       | 3.0    | 5.59    | 3.4    | 5.69    | 45.1   |
| O-Phosphoethanolamine        | 0.13                                       | 7.5    | 0.39    | 11.8   | 0.71    | 11.2   |
| Hypoxanthine                 | 38.19                                      | 7.3    | 110.10  | 3.0    | 203.20  | 5.2    |
| Galactose                    | 1.07                                       | 38.9   | 2.66    | 81.2   | 5.68    | 22.0   |
| Arginine                     | 1.18                                       | 7.8    | 3.18    | 6.4    | 4.71    | 30.3   |
| Citric acid + Isocitric acid | 0.98                                       | 6.2    | 2.78    | 14.0   | 5.05    | 6.9    |
| Psicose                      | 88.04                                      | 24.2   | 252.84  | 3.7    | 388.16  | 6.4    |
| Fructose                     | 68.25                                      | 6.3    | 178.79  | 2.9    | 309.28  | 5.7    |
| Allose                       | 129.73                                     | 4.4    | 323.86  | 5.8    | 524.71  | 7.6    |
| Mannose                      | 315.20                                     | 50.8   | 631.13  | 4.1    | 779.81  | 3.8    |
| Glucose                      | 22.92                                      | 3.7    | 60.68   | 6.4    | 110.25  | 6.1    |
| Lysine                       | 26.53                                      | 5.1    | 63.78   | 8.3    | 98.56   | 5.6    |
| Tyrosine                     | 1.31                                       | 5.6    | 3.22    | 7.5    | 5.25    | 9.5    |
| Mannitol                     | 4.47                                       | 3.7    | 11.68   | 7.8    | 21.20   | 8.2    |
| Pantothenic acid             | 0.19                                       | 3.1    | 0.53    | 5.7    | 1.03    | 7.2    |
| Xanthine                     | 3.96                                       | 3.9    | 11.61   | 5.8    | 21.36   | 5.4    |
| Gluconic acid                | 2.69                                       | 5.0    | 7.43    | 7.4    | 13.68   | 6.9    |
| Dopamine                     | 0.30                                       | 10.6   | 0.86    | 14.3   | 1.64    | 8.0    |
| N-Acetylmannosamine          | 0.05                                       | 66.5   | 0.25    | 10.8   | 0.48    | 7.7    |
| Uric acid                    | 0.10                                       | 1.2    | 0.32    | 0.8    | 0.36    | 18.0   |
| Inositol                     | 19.59                                      | 4.3    | 51.70   | 11.3   | 96.37   | 7.0    |
| Ribulose 5-phosphate         | 0.47                                       | 9.1    | 1.27    | 8.1    | 2.49    | 7.2    |
| Ribose 5-phosphate           | 0.03                                       | 89.5   | 0.12    | 36.8   | 0.23    | 26.7   |
| Cystamine                    | 0.12                                       | 26.1   | 0.94    | 22.2   | 2.32    | 6.5    |
| Tryptophan                   | 0.09                                       | 11.3   | 0.21    | 16.9   | 0.23    | 13.5   |
| Fructose 1-phosphate         | 48.53                                      | 7.5    | 132.15  | 4.2    | 235.39  | 8.0    |
| 5-Methoxytryptamine          | 1.23                                       | 9.4    | 2.04    | 7.5    | 1.70    | 7.9    |
| Inosine                      | 7.23                                       | 0.8    | 18.10   | 4.3    | 30.06   | 6.0    |
| Sedoheptulose 7-phosphate    | 0.76                                       | 26.1   | 1.95    | 7.6    | 3.03    | 2.6    |
| Adenosine                    | N.D.                                       | -      | N.D.    | -      | 0.21    | 12.7   |
| Xanthosine                   | 0.02                                       | 173.2  | 0.11    | 41.3   | 0.10    | 18.3   |
| Trehalose                    | 3.66                                       | 3.1    | 9.42    | 1.4    | 14.72   | 6.1    |
| Maltose                      | 0.58                                       | 4.6    | 1.54    | 5.7    | 2.52    | 11.4   |
| Maltitol                     | N.D.                                       | -      | 0.18    | 11.0   | 0.28    | 30.2   |
| Isomaltose                   | 0.16                                       | 3.0    | 0.38    | 9.8    | 0.71    | 7.6    |

Fig. S1

**Table S1. Metabolites detected in lean beef by GC/MS**

The reproducibility of GC/MS analysis was evaluated by CV%. The test was repeated three times using different amounts of muscle tissue (0.02, 0.05, or 0.1 g). For lean beef samples, we used the psoas major of Australian beef (commercial quality in Japan), which is primarily composed of slow-type muscle. The values colored with a white-red gradient indicate the relative deviation of the compound between analyses (light pink,  $CV > 20\%$ ; red,  $CV > 30\%$  or not detected). Over 80 metabolites were detected across the samples (20-mg sample, 81 metabolites; 50-mg sample, 82 metabolites; 100-mg sample, 83 metabolites), and the detection of most metabolites was confirmed to be concentration-dependent (20-mg sample, 70 metabolites; 50-mg sample, 75 metabolites; 100-mg sample, 77 metabolites).
