# Supplementary material
Source: publisher figshare collection journal article supplement (https://tandf.figshare.com/articles/dataset/_/7228079)
Supplement: Supplementary file 2 [file 1]

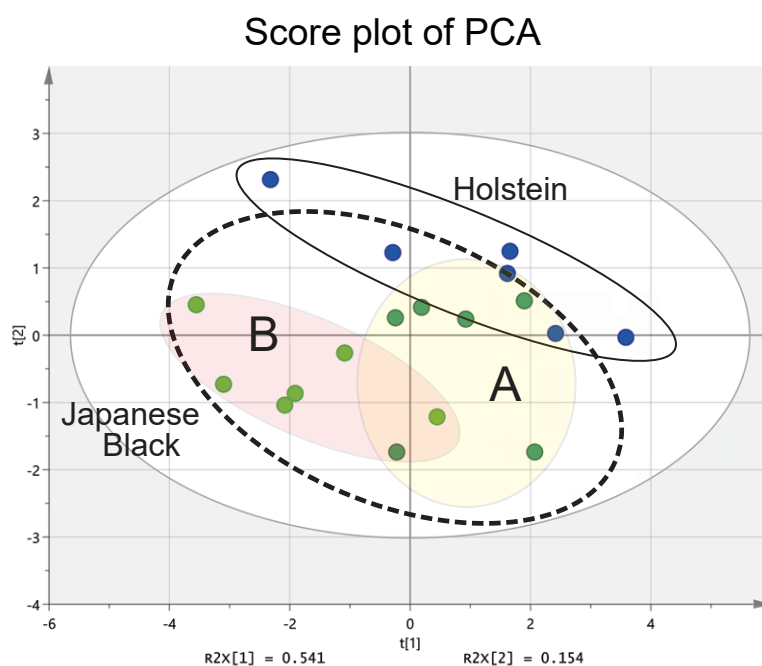

Fig. S3

**Fig. S3. PCA analysis of marbled beef**

PCA score plot comparing beef composition between breeds (Scaling, Pareto variance).

The PCA model was analyzed using fitting parameters (Components, [1+2+3];  $R^2$  [cum]

= 0.804;  $Q^2$  [cum] = 0.500).
