# Supplementary material
Source: publisher figshare collection journal article supplement (https://tandf.figshare.com/articles/dataset/_/7228079)
Supplement: Supplementary file 3 [file 1]

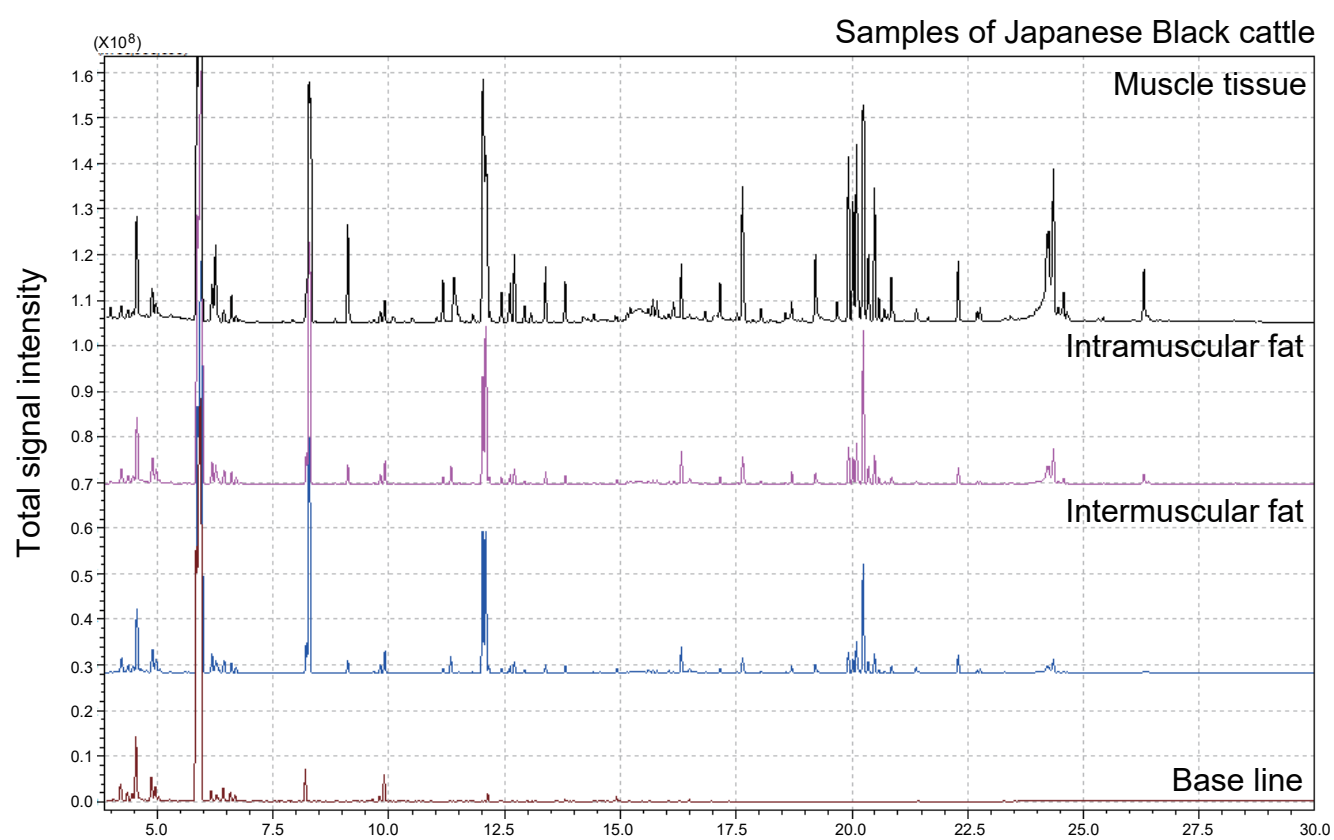

Fig. S2

**Fig. S2. Representative chromatogram of GC/MS analysis**

Chromatogram of the total ions in each tissue of Japanese Black cattle.
